# Supplementary material for: Identification of bacterial communities associated with needle mushroom (Flammulina filiformis) and its production environment
Source: Front Microbiol. 2024 Dec 17;15:1429213. doi: 10.3389/fmicb.2024.1429213 (PMC11685130; doi:10.3389/fmicb.2024.1429213)
Supplement: Supplementary file 1 [file Table_1.XLSX]

## Sheet: Sheet1
Supplementary Table S1: Statistical table for data pre-processing and quality control
#Sample_name	Raw_reads(#)	Clean_Reads(#)	Base(nt)	AvgLen(nt)	Q20	GC%	Effective%
C1.1	83665	80170	20229221	252	78.17	51.21	95.82
C1.2	64388	62815	15849667	252	70.7	50.81	97.56
C1.3	73456	71359	18001840	252	74.53	50.78	97.15
C2.1	82763	80288	20249048	252	87.15	51.48	97.01
C2.2	83228	80195	20382570	254	75.04	54.14	96.36
C2.3	64932	62809	15885879	252	70.12	51.37	96.73
C3.1	82890	80055	20243868	252	79.68	52.7	96.58
C3.2	85312	80168	20292099	253	80.84	52.3	93.97
C3.3	85813	80130	20265388	252	87.13	54.3	93.38
C4.1	83428	80219	20161492	251	75.58	50.65	96.15
C4.2	85040	80161	20240456	252	87.78	50.65	94.26
C4.3	83931	80081	20140237	251	75.45	50.88	95.41
C5.1	67820	66222	16765421	253	77.67	53.33	97.64
C5.2	84458	80182	20282670	252	83.65	50.94	94.94
C5.3	58184	56401	14252911	252	79.32	52.84	96.94
C6.1	84366	80214	20190660	251	76.16	52.51	95.08
C6.2	83857	80281	20275970	252	80.14	51.96	95.74
C6.3	84916	80046	20295898	253	78.4	54.82	94.26
C7.1	56728	54449	13767862	252	85.8	53.24	95.98
C7.2	85970	80024	20267956	253	77.27	52.45	93.08
C7.3	59721	57322	14248864	248	87.7	51.35	95.98
C8.1	85433	80299	20314493	252	79.28	52.07	93.99
C8.2	83402	80207	20333882	253	78.37	55.06	96.17
C8.3	59324	56494	14275433	252	89.37	53.65	95.23
G1.1	84719	80130	20238483	252	88.81	51.55	94.58
G1.2	79041	75892	19208779	253	77.97	51.71	96.02
G1.3	82897	80129	20291179	253	75.53	51.5	96.66
G2.1	69936	67558	17132410	253	75.44	55.2	96.6
G2.2	83075	80318	20309753	252	82.78	54.3	96.68
G2.3	67660	64637	16352516	252	75.14	53.72	95.53
G3.1	82915	80282	20310558	252	75.07	52.35	96.82
G3.2	82770	80011	20231088	252	76.27	52.26	96.67
G3.3	84047	80239	20244144	252	86.12	51.26	95.47
G4.1	81829	80161	20250158	252	74.29	50.21	97.96
G4.2	84494	80125	20228849	252	89.09	50.8	94.83
G4.3	83818	80246	20251206	252	89.47	51.72	95.74
G5.1	93504	88887	22464459	252	88.59	53.65	95.06
G5.2	88076	82778	20894726	252	82.89	51.57	93.98
G5.3	75174	69156	17425583	251	87.49	52.6	91.99
G6.1	83681	80063	20321158	253	74.7	54.56	95.68
G6.2	83757	80159	20240617	252	89.03	51.92	95.7
G6.3	86225	80162	20193102	251	89.31	51.32	92.97
G7.1	82788	80446	20307594	252	89.82	52.2	97.17
G7.2	87313	80057	20236463	252	85.13	52.07	91.69
G7.3	86553	80260	20279736	252	90.14	52.42	92.73
Average	79717.7	76050.8				52.32	95.47
